# Supplementary material for: Medical Care for Tuberculosis-HIV-Coinfected Patients in Russia with Respect to a Changeable Patients’ Structure
Source: MDPI journal article supplement (doi:10.3390/tropicalmed7060086), 2022-05-31
Supplement: s1 [file s1]

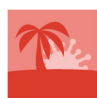

## Supplementary Materials:

**Table S1. Questionnaire on chemoprophylaxis for patients with tuberculosis-HIV-coinfection**

|    |                                                                                                                |  |
|----|----------------------------------------------------------------------------------------------------------------|--|
| 1  | Number of the medical card of an outpatient patient in the Central district clinic of _____(region)            |  |
| 2  | Sex/gender                                                                                                     |  |
| 3  | Date of birth/age                                                                                              |  |
| 4  | Place of residence (city/village)                                                                              |  |
| 5  | Occupation, employment status, disability                                                                      |  |
| 6  | Date of registration of HIV infection                                                                          |  |
| 7  | Circumstances under which HIV infection was detected (complaints, active detection, etc.)                      |  |
| 8  | Period of time in which HIV infection could have occurred                                                      |  |
| 9  | Rout of HIV transmission                                                                                       |  |
| 10 | Stage of HIV infection                                                                                         |  |
| 11 | Number of CD4 lymphocytes /date                                                                                |  |
| 12 | Secondary diseases/date                                                                                        |  |
| 13 | Concomitant diseases/date                                                                                      |  |
| 14 | Antiretroviral treatment (when he/she started, how he/she tolerates, what medications he/she receives)         |  |
| 15 | Were there any interruptions in treatment?<br>What are they related to?                                        |  |
| 16 | Other HIV patients in the family (who?)                                                                        |  |
| 17 | TB patients in the family (presence of MDR)                                                                    |  |
| 18 | The Mantoux test results (in childhood, now)                                                                   |  |
| 19 | Physiological anamnesis (contact with a patient who had tuberculosis, was registered at TB clinics or centers) |  |
| 20 | Stay in penitentiary institutions (not been, less than a year, 1-3 years, more than 3 years)                   |  |

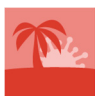

|    |                                                                                     |  |
|----|-------------------------------------------------------------------------------------|--|
| 21 | The last radiological scanning of the lungs (date)                                  |  |
| 22 | Chemoprophylaxis of tuberculosis (earlier and last)                                 |  |
| 23 | Who issued the anti-TB drugs                                                        |  |
| 24 | The period of time for receiving anti-TB drugs (the dates of the beginning and end) |  |
| 25 | At what time did you take anti-TB drugs?                                            |  |
| 26 | The regularity of receiving anti-TB drugs                                           |  |
| 27 | Did one of the relatives help to control the intake of drugs?                       |  |
| 28 | Causes of irregular medication intake                                               |  |
